# Supplementary material
Source: publisher figshare collection journal article supplement (https://acs.figshare.com/ndownloader/files/27531500)
Supplement: Supplementary file 1 [file 27531500]

# Osmolytes can Destabilize Proteins in Cells by Modulating Electrostatics and Quinary Interactions

Xiangfei Song,<sup>a,b,c,†</sup> Liaoyuan An,<sup>a,b,c,†</sup> Mengting Wang,<sup>a,b,c</sup> Jingfei Chen,<sup>a,b</sup> Zhijun Liu,<sup>d</sup> and Lishan Yao<sup>a,b,\*</sup>

<sup>a</sup> Key Laboratory of Biofuels and <sup>b</sup> Shandong Provincial Key Laboratory of Synthetic Biology, Qingdao Institute of Bioenergy and Bioprocess Technology, Chinese Academy of Sciences, Qingdao, 266101, China

<sup>c</sup> University of Chinese Academy of Sciences, Beijing, 100049, China

<sup>d</sup> National Facility for Protein Science, Zhangjiang Lab, Shanghai Advanced Research Institute, CAS, 201210, China

## Supporting Information

<sup>‡</sup>These two authors contributed equally to the work.

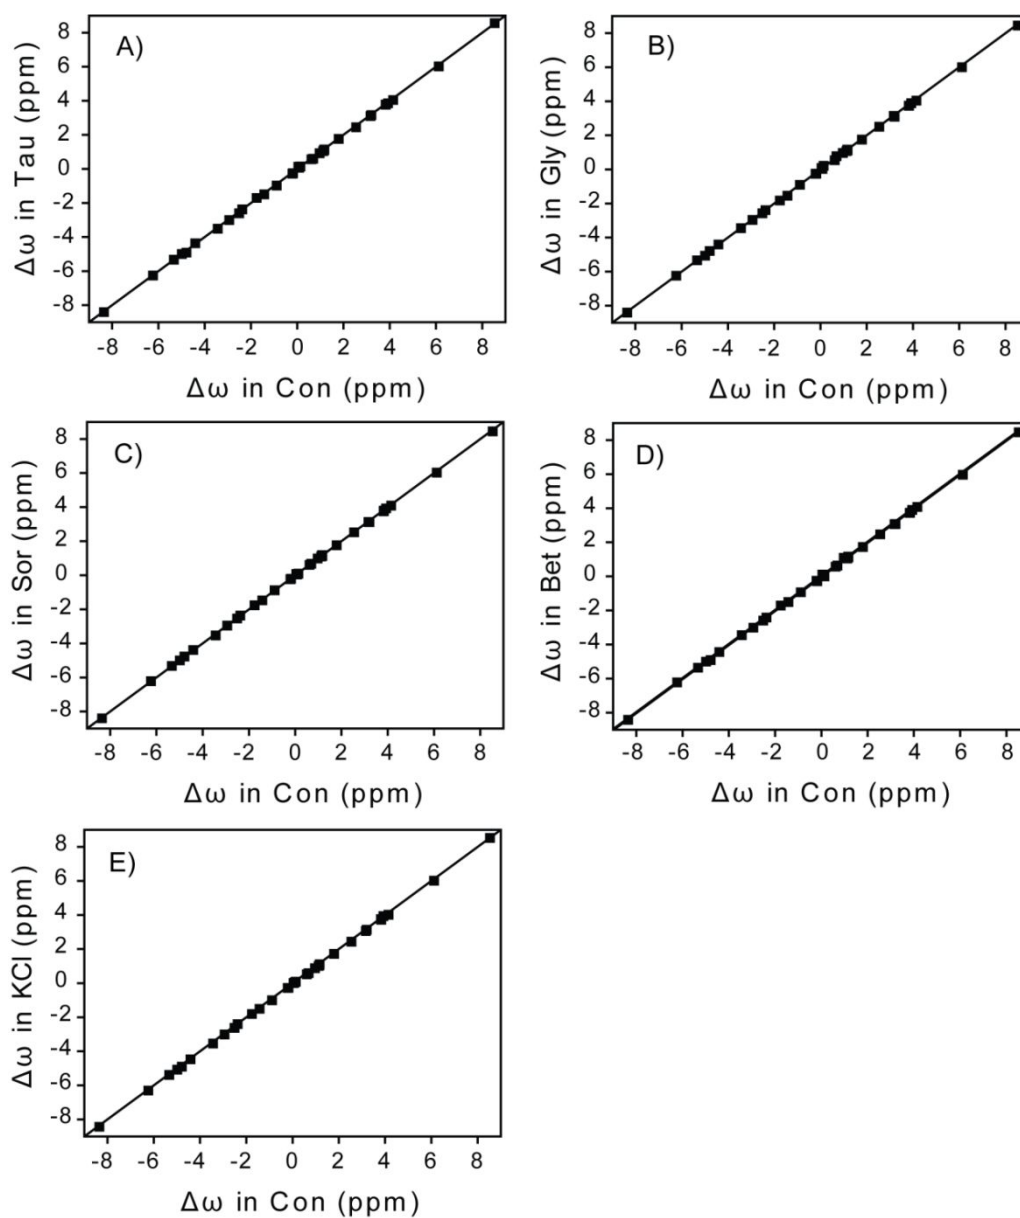

Figure S1. Correlation between  $\Delta\omega$ , the chemical shift difference between unfold state and fold state *in vitro* in the absence (Con) or presence of different small molecules.

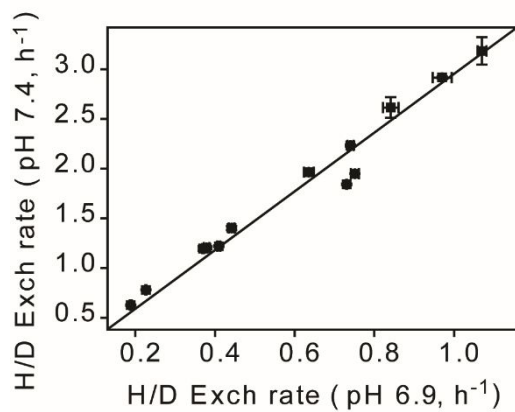

Figure S2. Correlation between the H/D exchange rates of 13 slowest exchanged

amides of MutX in two pH conditions. The best fitted line is  $y = 2.94x$ .

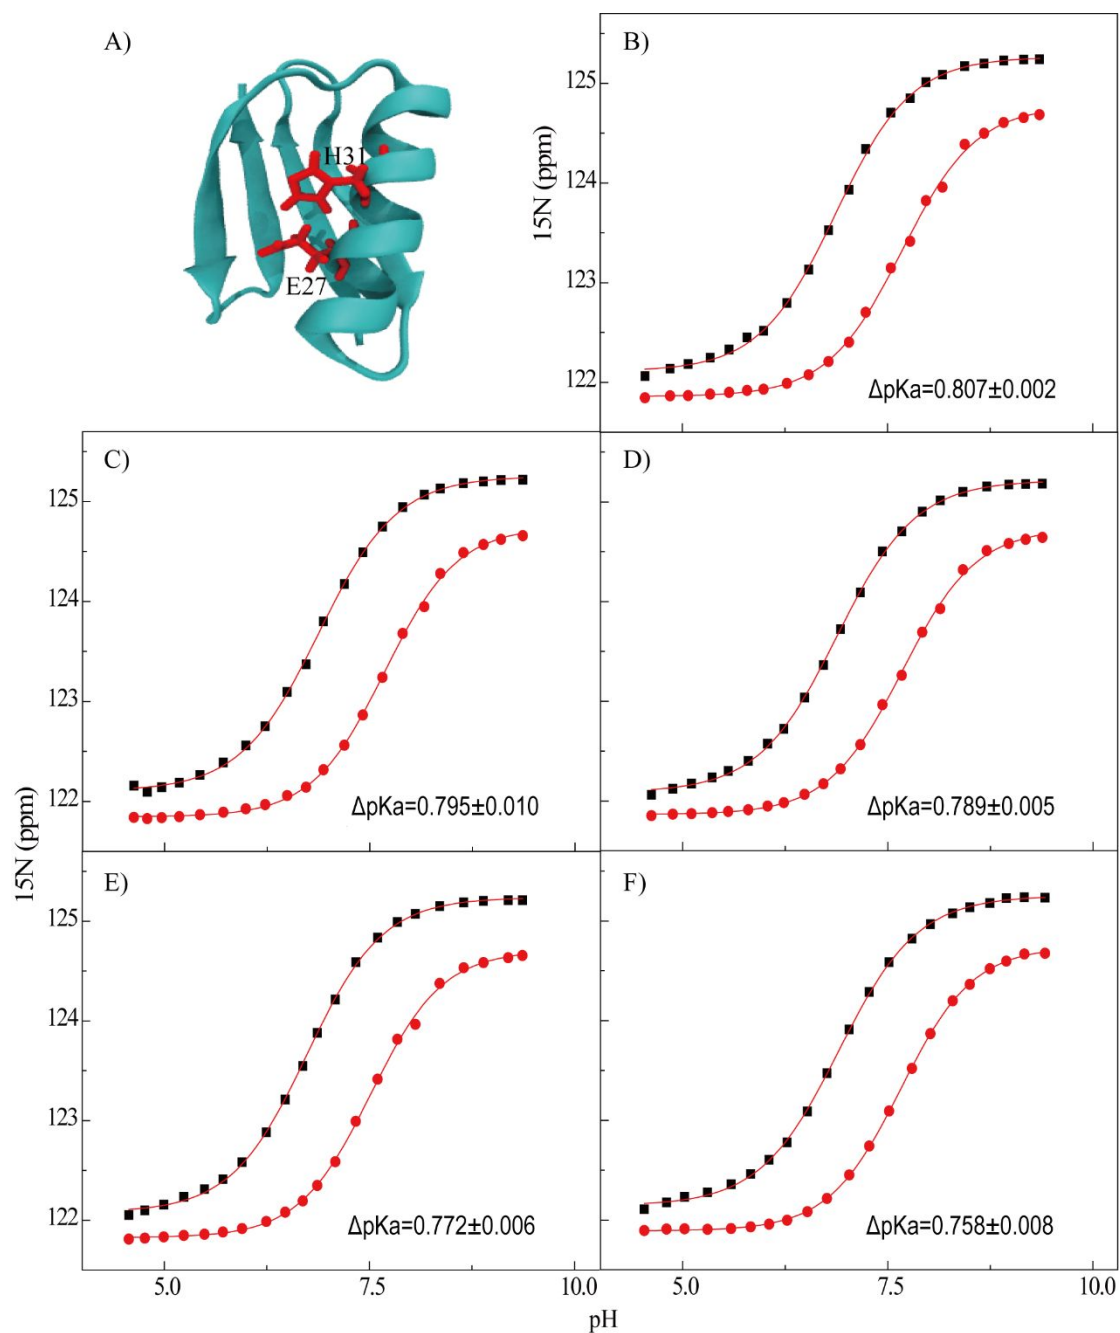

Figure S3. (A) Salt bridge H31-E27 in the structure of GB3.  $^{15}\text{N}$  chemical shift of H31 of H31-E27 (red) and H31-Q27 (black) at 298 K and different pHs without osmolyte (B), or in the presence of 500 mM sorbitol (C), glycerol (D), betaine (E) and taurine (F). The chemical shift was fitted to the Henderson-Hasselbalch equation to yield corresponding  $\text{pKa}$  values.

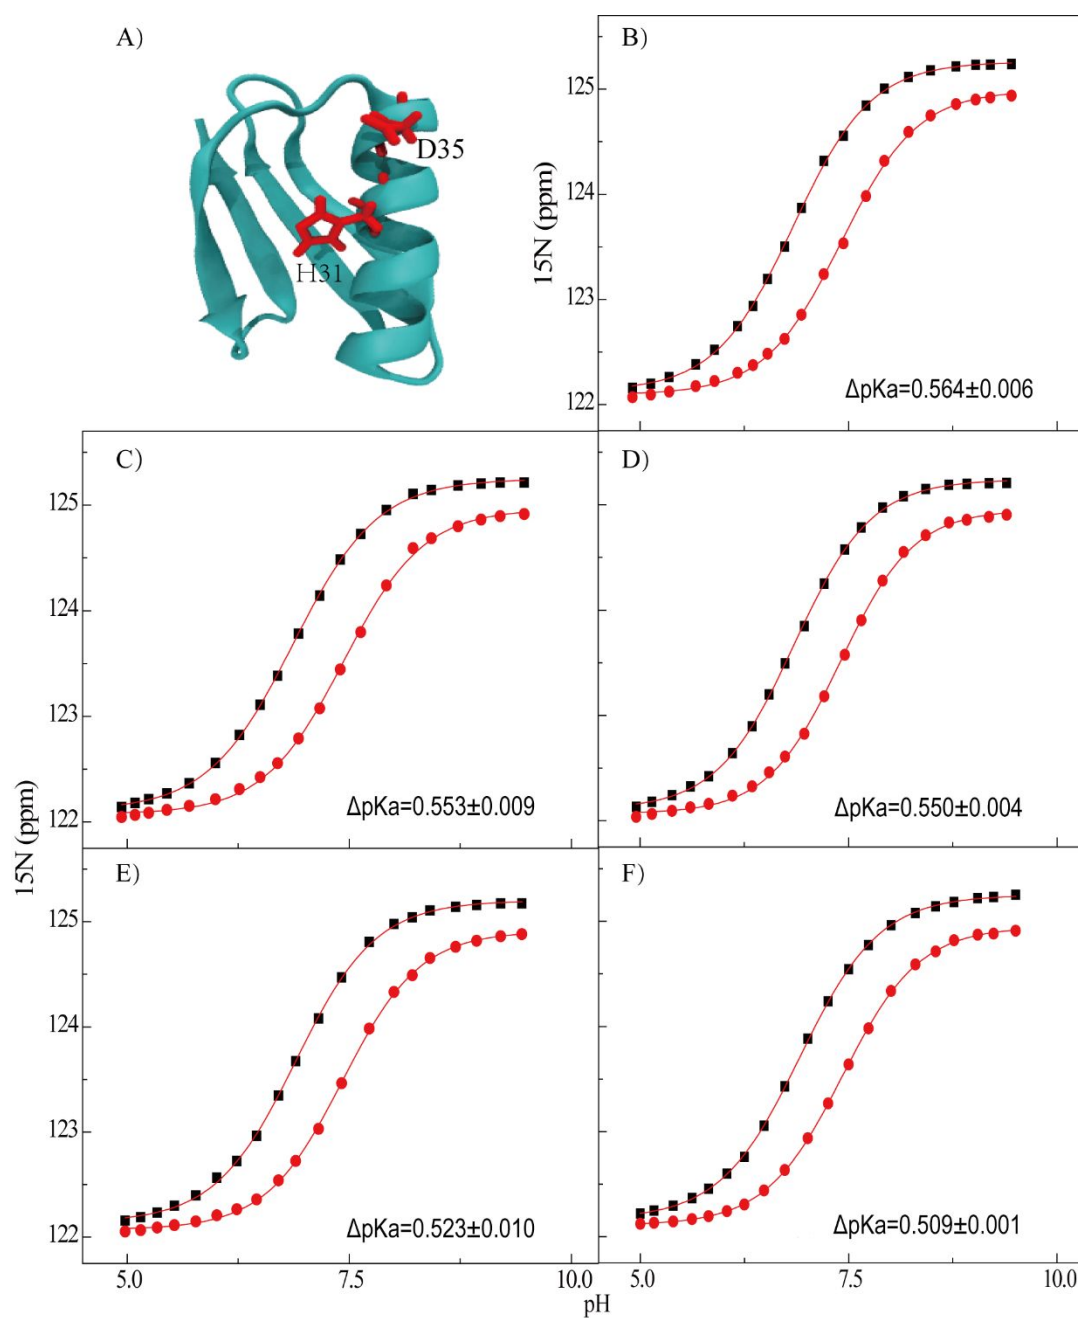

Figure S4. (A) Salt bridge H31-D35 in the structure of GB3.  $^{15}\text{N}$  chemical shift of H31 of H31-D35 (red) and H31-N35 (black) at 298 K and different pHs without osmolyte (B), or in the presence of 500 mM sorbitol (C), glycerol (D), betaine (E) and taurine (F). The chemical shift was fitted to the Henderson-Hasselbalch equation to yield corresponding  $\text{pK}_a$  values.

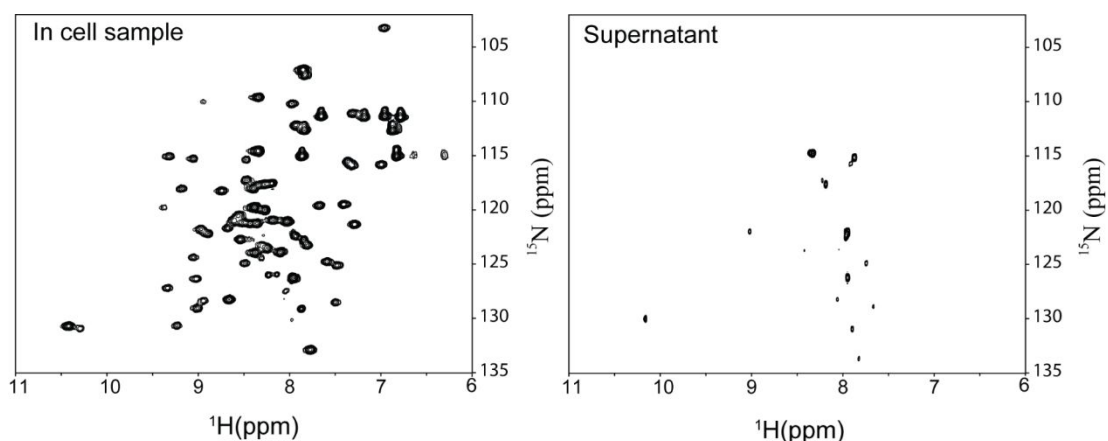

Figure S5.  $^1\text{H}$ - $^{15}\text{N}$  HSQC spectra of the GB3 mutant MutX in *E. coli* cells and in supernatant after 3.5 h of NMR CPMG measurement. The in-cell sample was dissolved in 40 mM bis-tris propane, and 40 mM HEPES, pH 7.8.

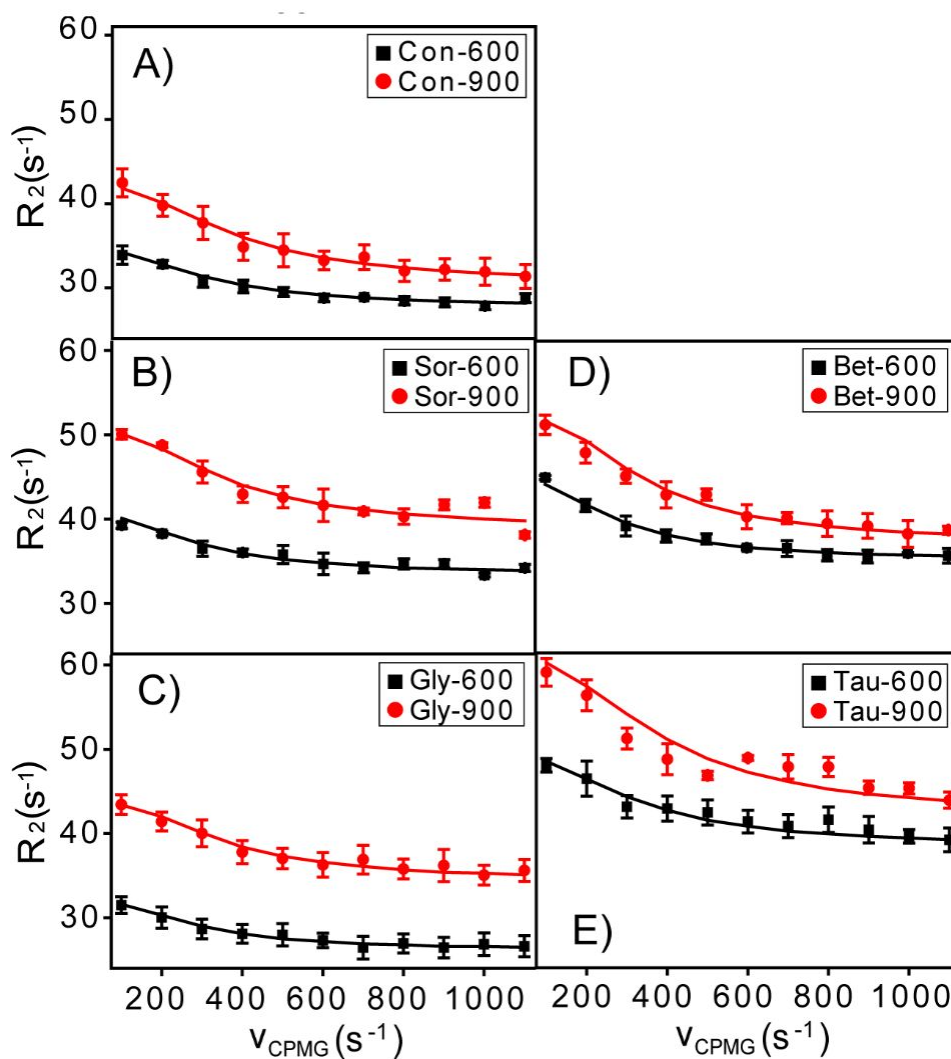

Figure S6. Global fitting of  $^{15}\text{N}$  CPMG profiles for A48 at 600 and 900 MHz magnetic fields in cells with or without osmolytes.

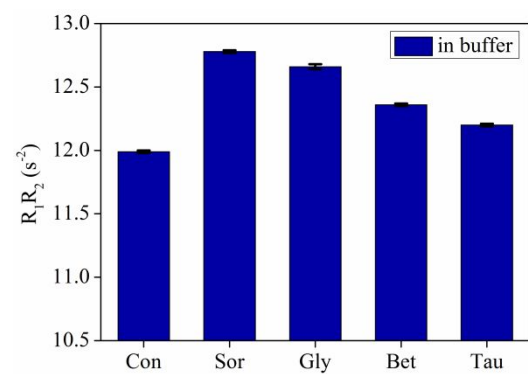

Figure S7. Product of average  $R_1R_2$  of MutX in *in vitro* in the absence or presence of 400 mM osmolytes.
